# Supplementary material for: Reactivity of molybdenum–nitride complex bearing pyridine-based PNP-type pincer ligand toward carbon-centered electrophiles
Source: Royal Society of Chemistry journal article supplement (doi:10.1039/d1dt03952k), 2021-12-22
Supplement: d1dt03952k1.pdf [file d1dt03952k1.pdf]

Supplementary Information

## **Reactivity of molybdenum-nitride complex bearing pyridine-based PNP-type pincer ligand toward various carbon-centered electrophiles**

Takayuki Itabashi, Kazuya Arashiba, Shogo Kuriyama, Yoshiaki Nishibayashi\*

Department of Applied Chemistry, School of Engineering, The University of Tokyo, Hongo, Bunkyo-ku, Tokyo 113-8656, Japan

### **Contents**

|                                 |        |
|---------------------------------|--------|
| <b>1. NMR spectra</b>           | p. S2  |
| <b>2. IR spectra</b>            | p. S11 |
| <b>3. X-ray Crystallography</b> | p. S13 |
| <b>4. References</b>            | p. S25 |

## NMR spectra

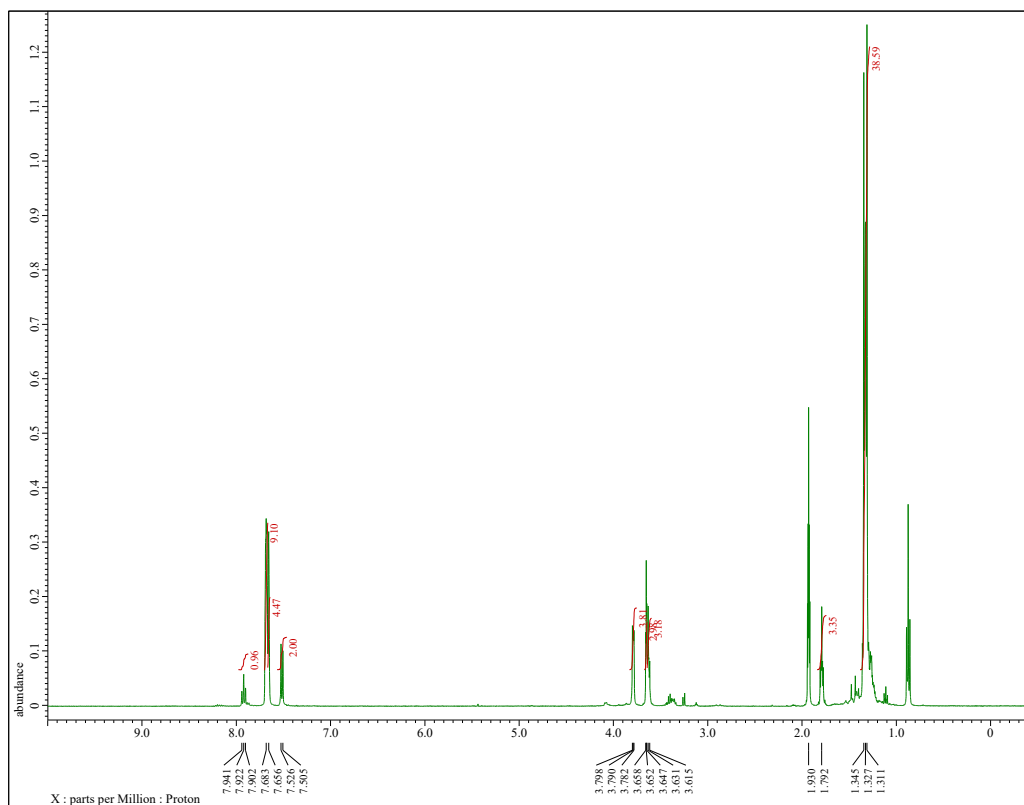

**Fig. S1**  $^1\text{H}$  NMR spectrum of **2** in  $\text{CD}_3\text{CN}$

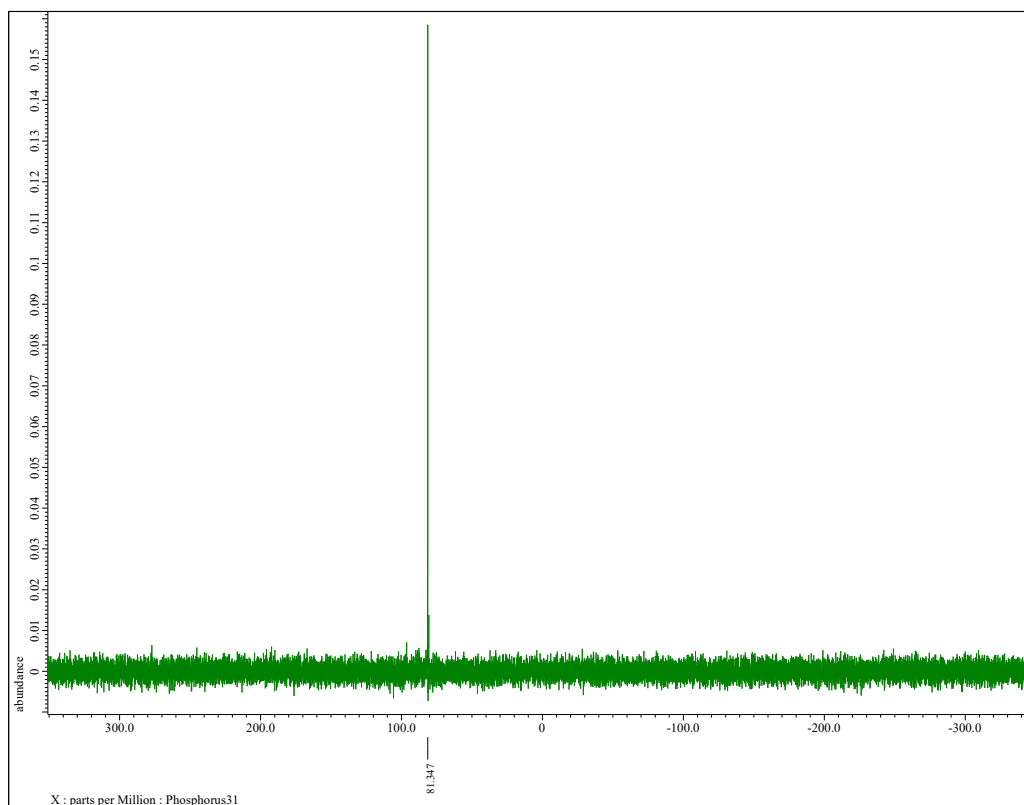

**Fig. S2**  $^{31}\text{P}\{^1\text{H}\}$  NMR spectrum of **2** in  $\text{CD}_3\text{CN}$

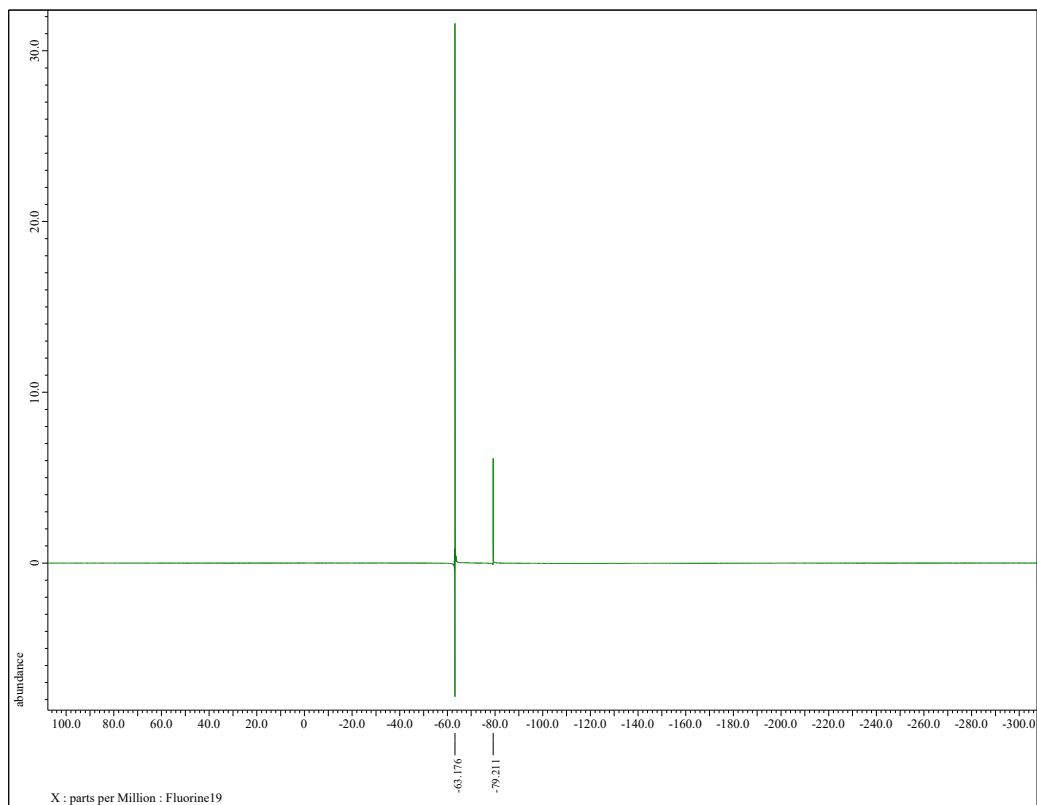

Fig. S3  $^{19}\text{F}$  NMR spectrum of **2** in  $\text{CD}_3\text{CN}$

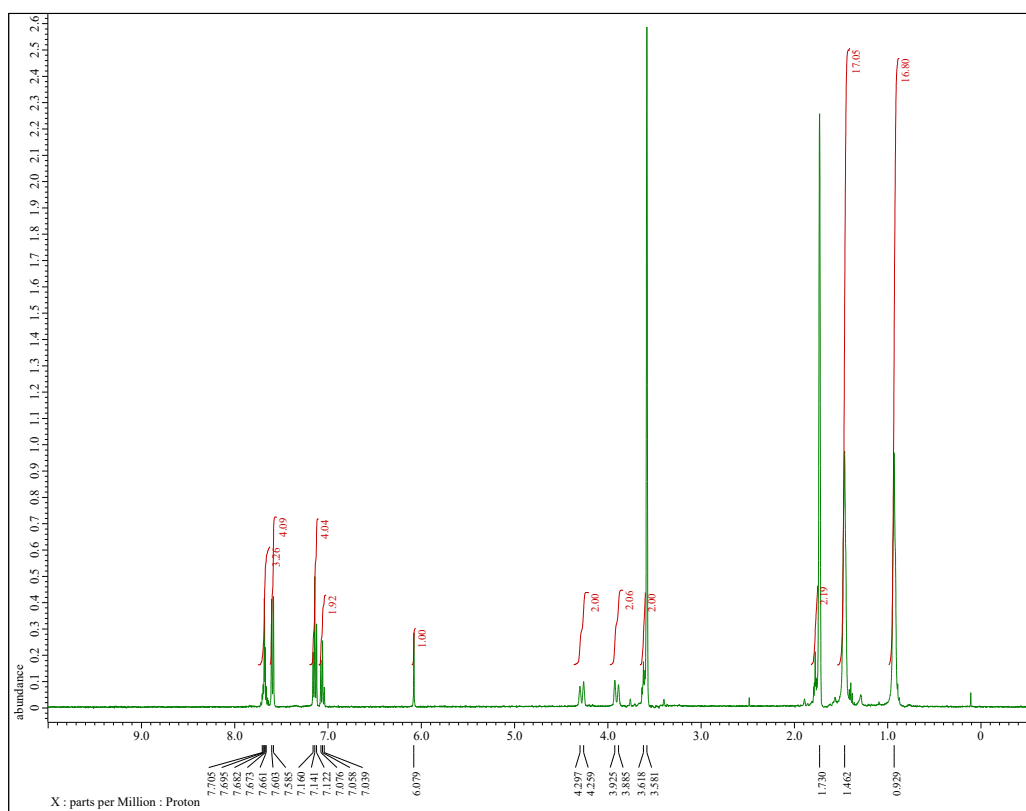

Fig. S4  $^1\text{H}$  NMR spectrum of **3** in  $\text{THF-}d_8$

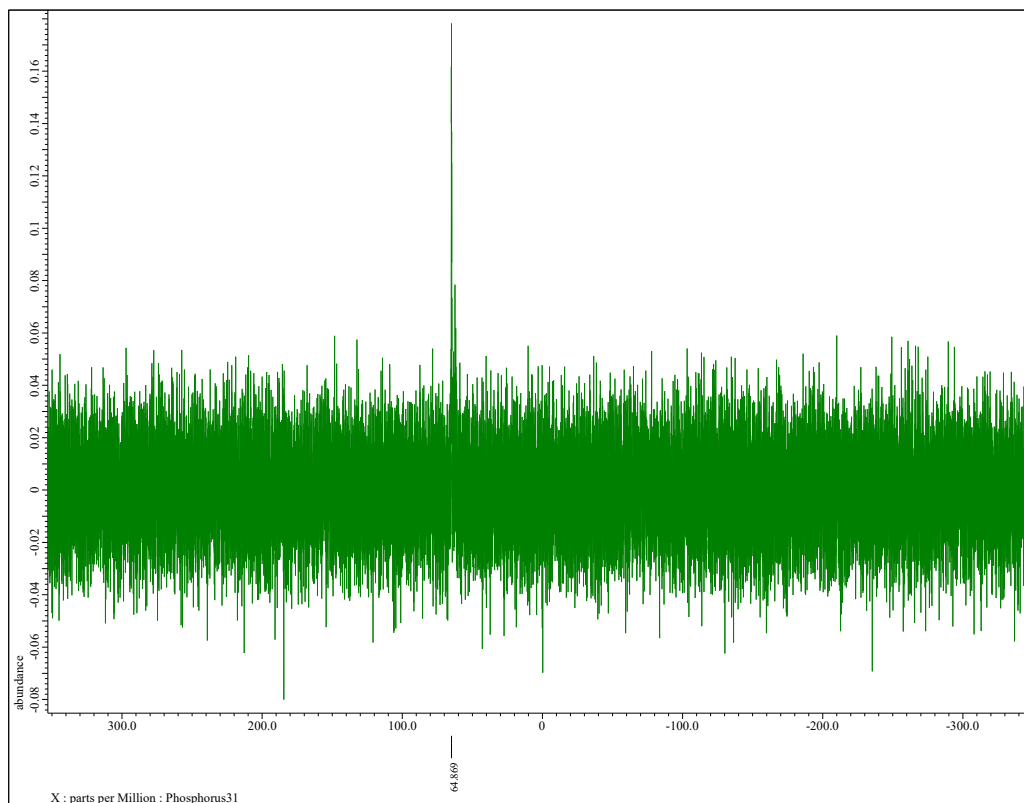

Fig. S5  $^{31}\text{P}\{^1\text{H}\}$  NMR spectrum of **3** in  $\text{THF-}d_8$

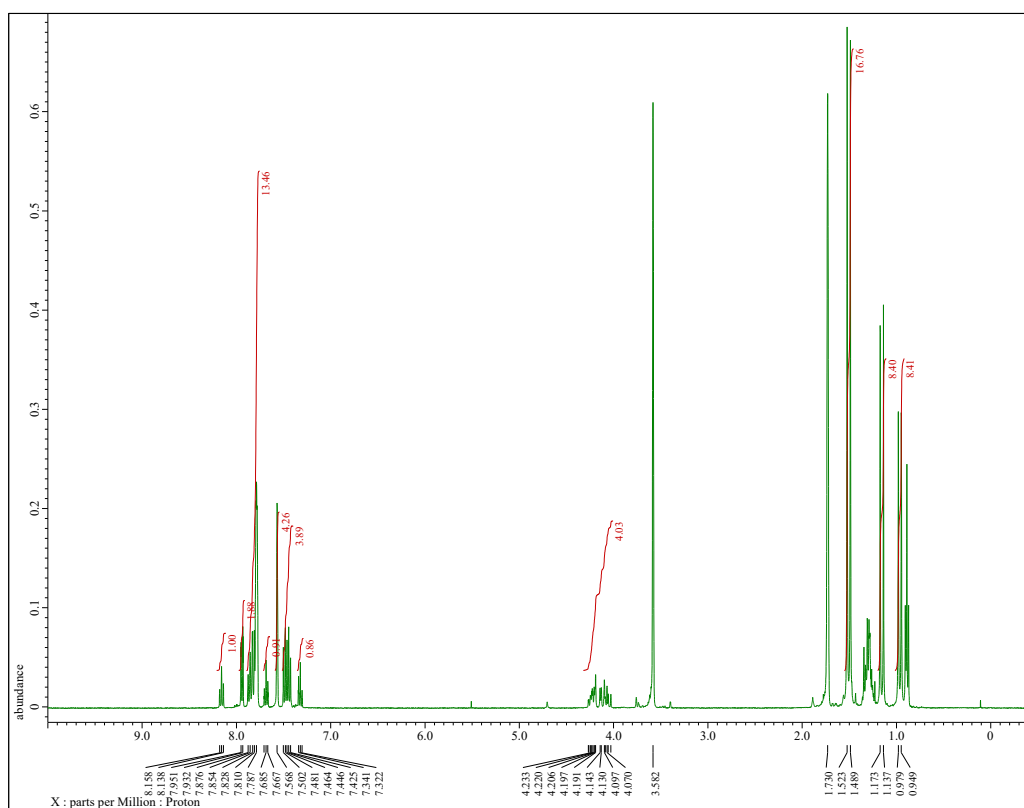

Fig. S6  $^1\text{H}$  NMR spectrum of **4** in  $\text{THF-}d_8$

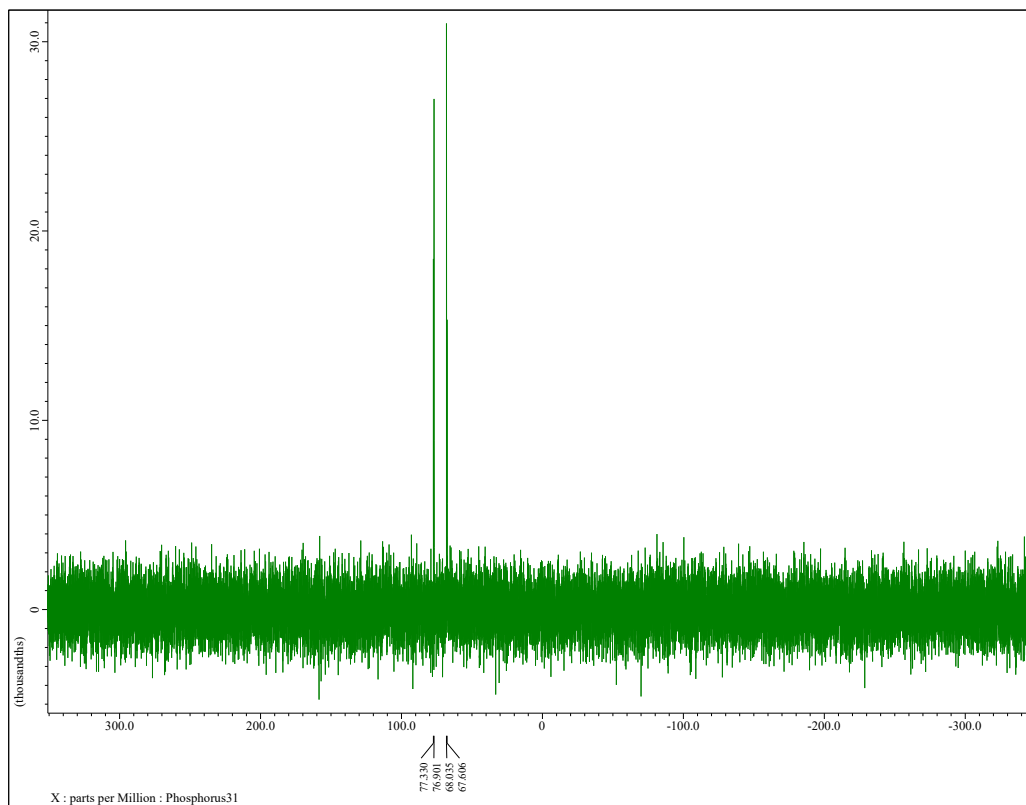

Fig. S7  $^{31}\text{P}\{^1\text{H}\}$  NMR spectrum of **4** in  $\text{THF-}d_8$

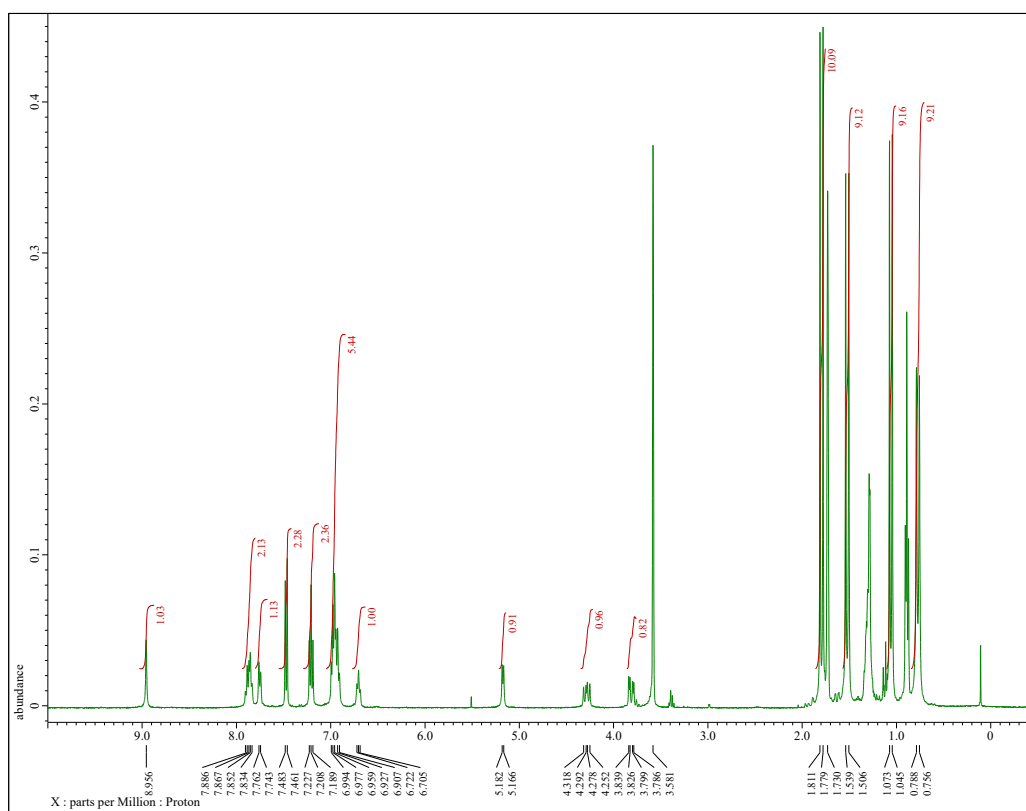

Fig. S8  $^1\text{H}$  NMR spectrum of **5** in  $\text{THF-}d_8$

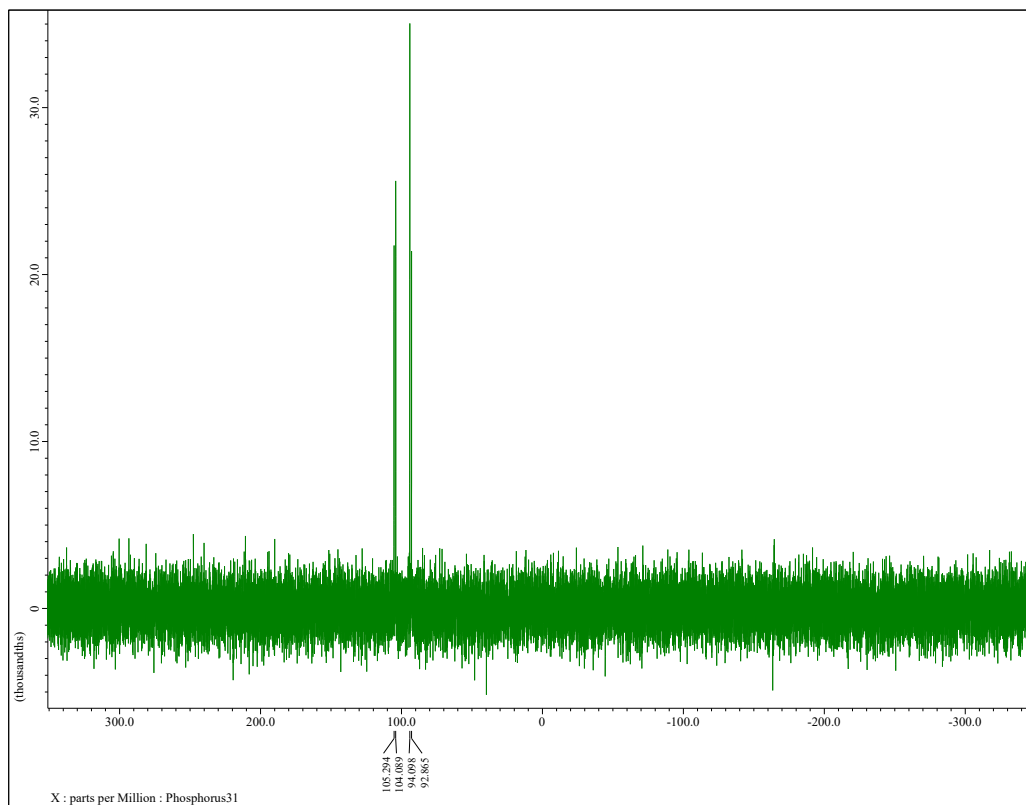

Fig. S9  $^{31}\text{P}\{^1\text{H}\}$  NMR spectrum of **5** in  $\text{THF-d}_8$

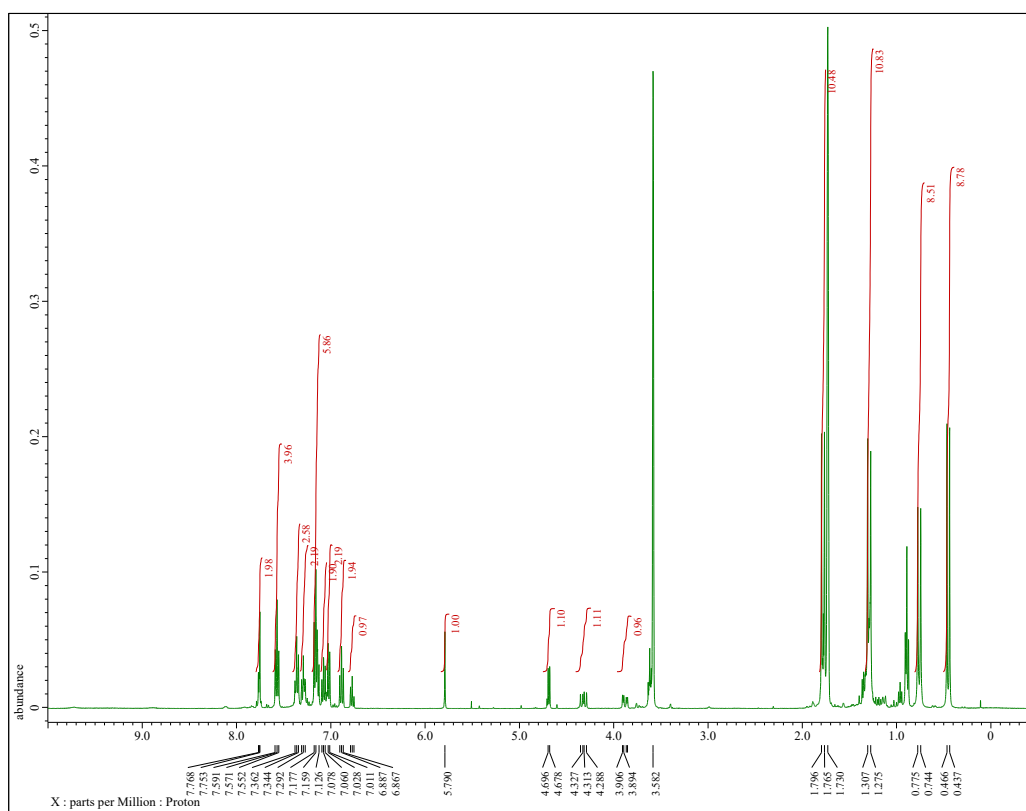

Fig. S10  $^1\text{H}$  NMR spectrum of **6** in  $\text{THF-d}_8$

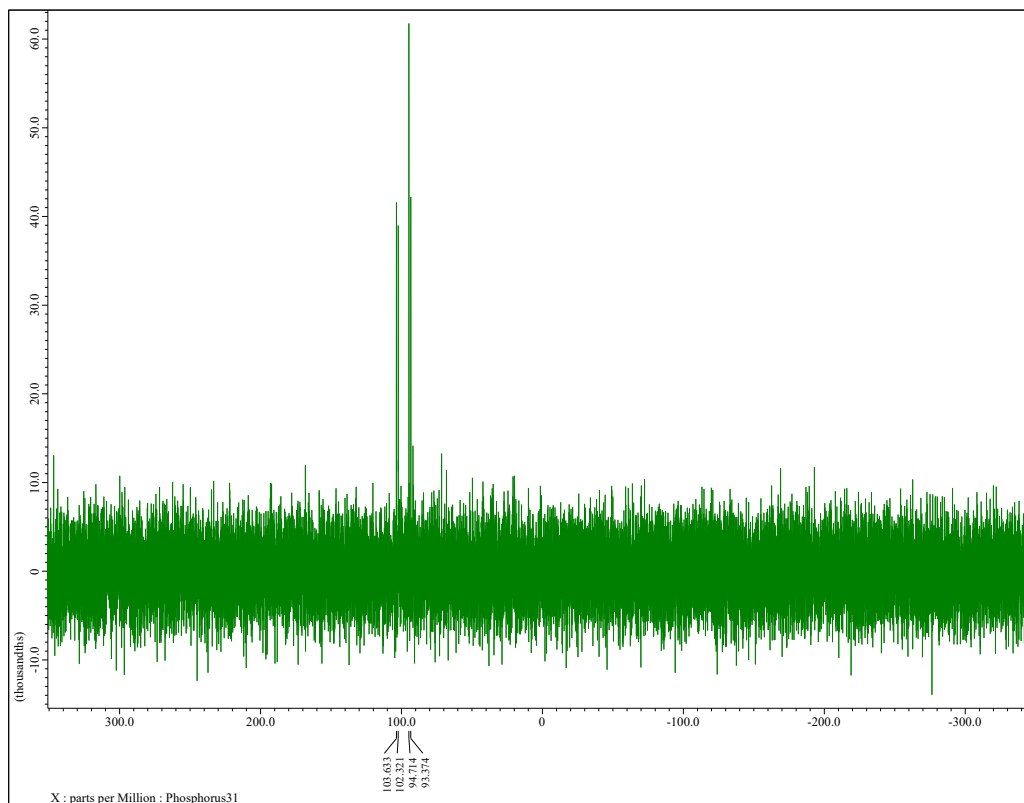

Fig. S11  $^{31}\text{P}\{^1\text{H}\}$  NMR spectrum of **6** in  $\text{THF-}d_8$

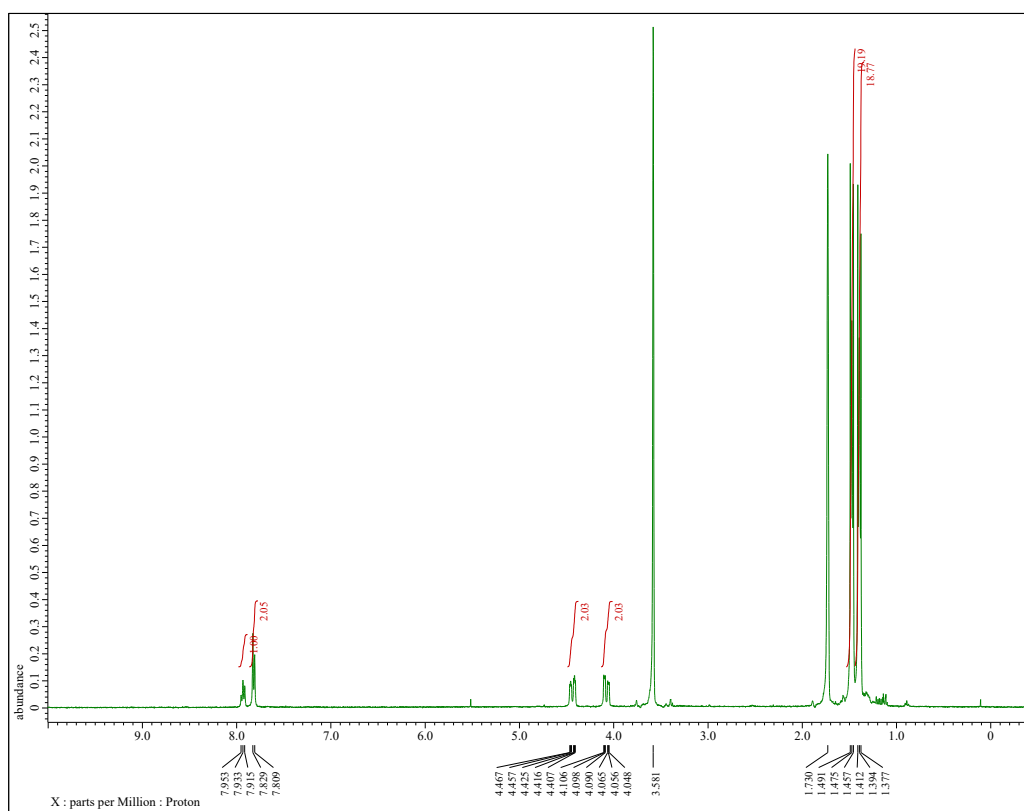

Fig. S12  $^1\text{H}$  NMR spectrum of **7** in  $\text{THF-}d_8$

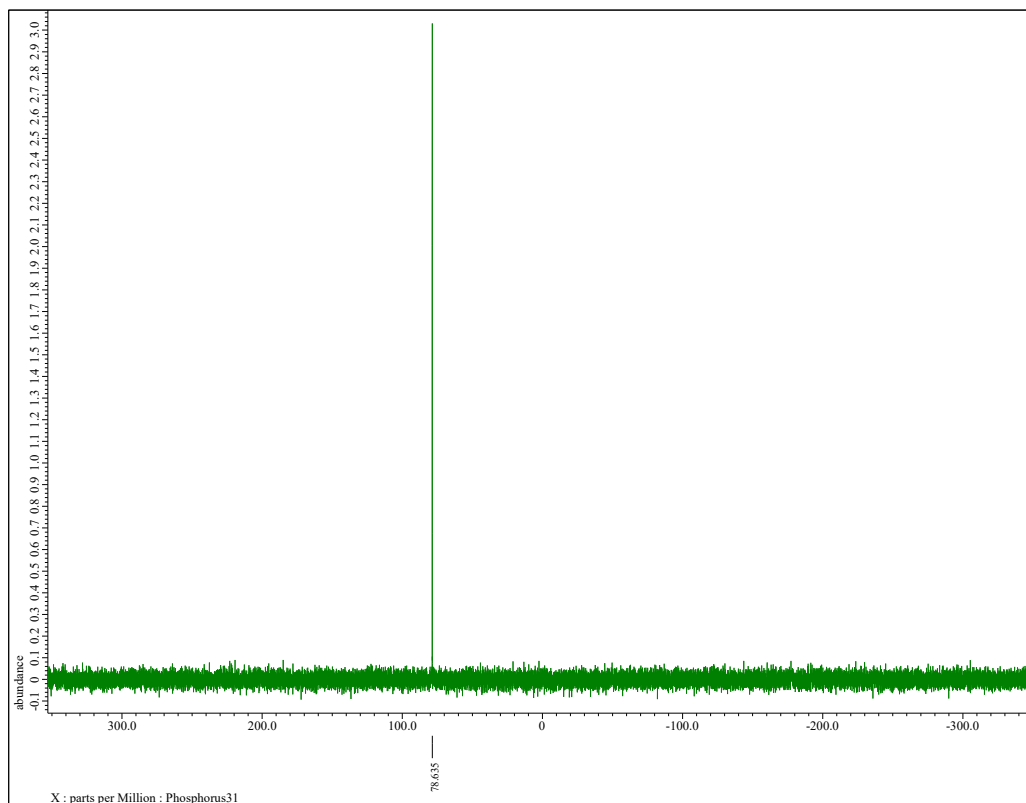

Fig. S13  $^{31}\text{P}\{^1\text{H}\}$  NMR spectrum of **7** in  $\text{THF-}d_8$

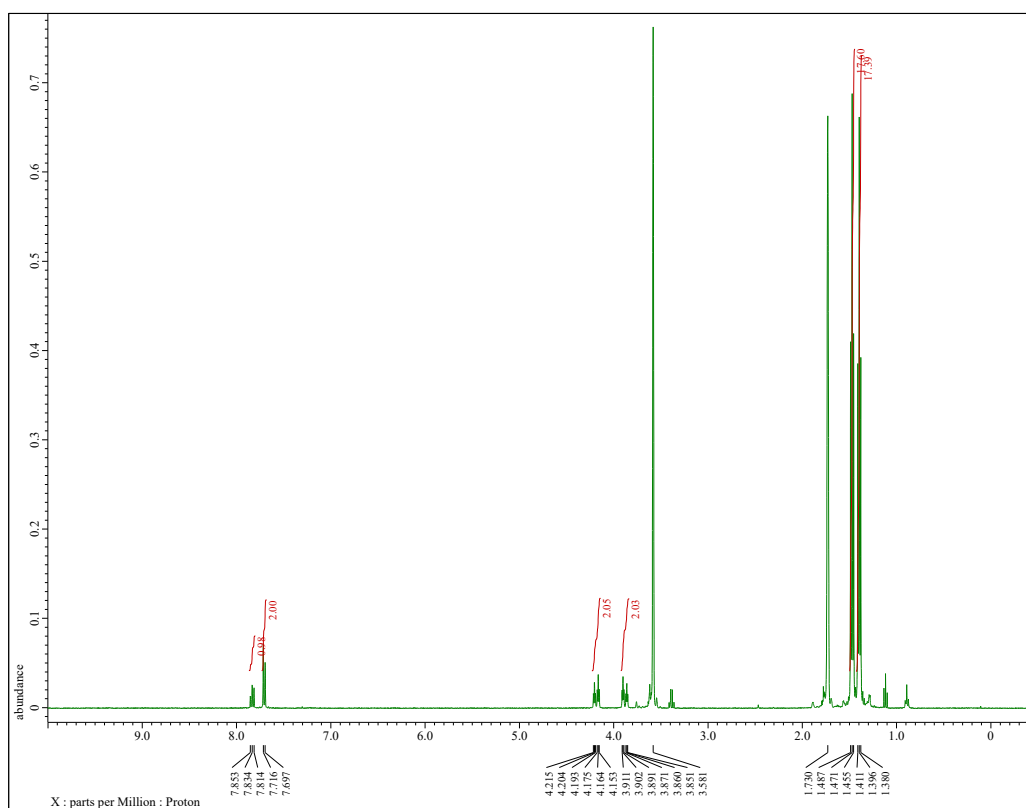

Fig. S14  $^1\text{H}$  NMR spectrum of **8** in  $\text{THF-}d_8$



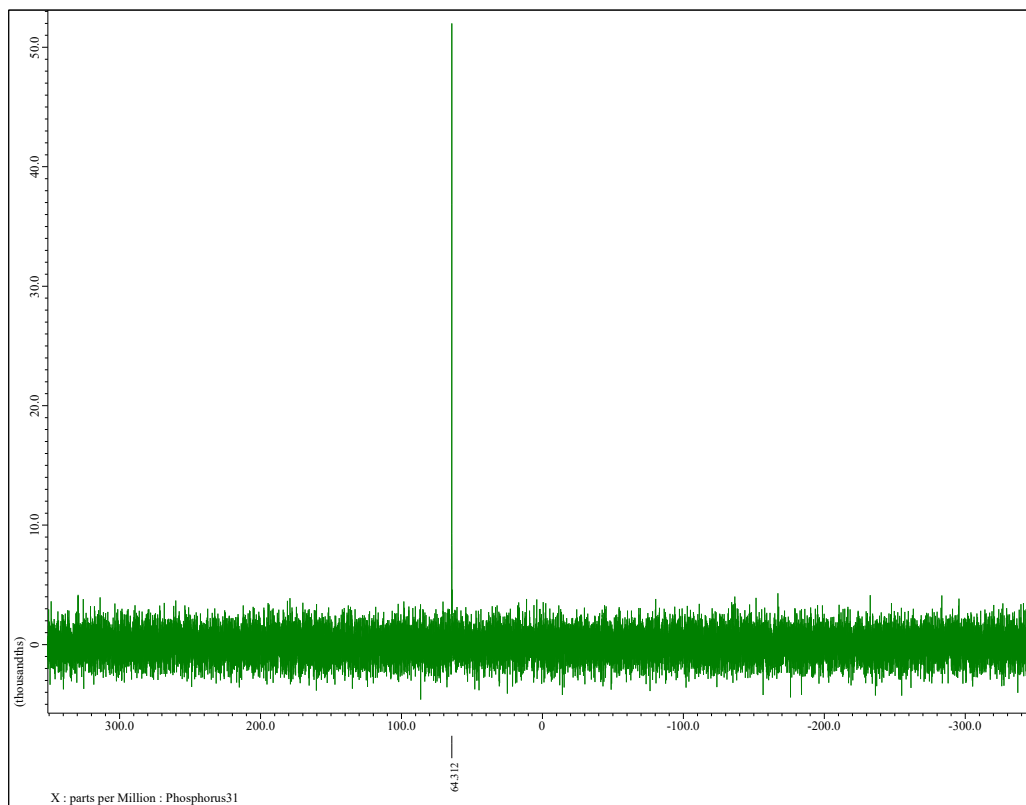

Fig. S15  $^{31}\text{P}\{^1\text{H}\}$  NMR spectrum of **8** in  $\text{THF-}d_8$

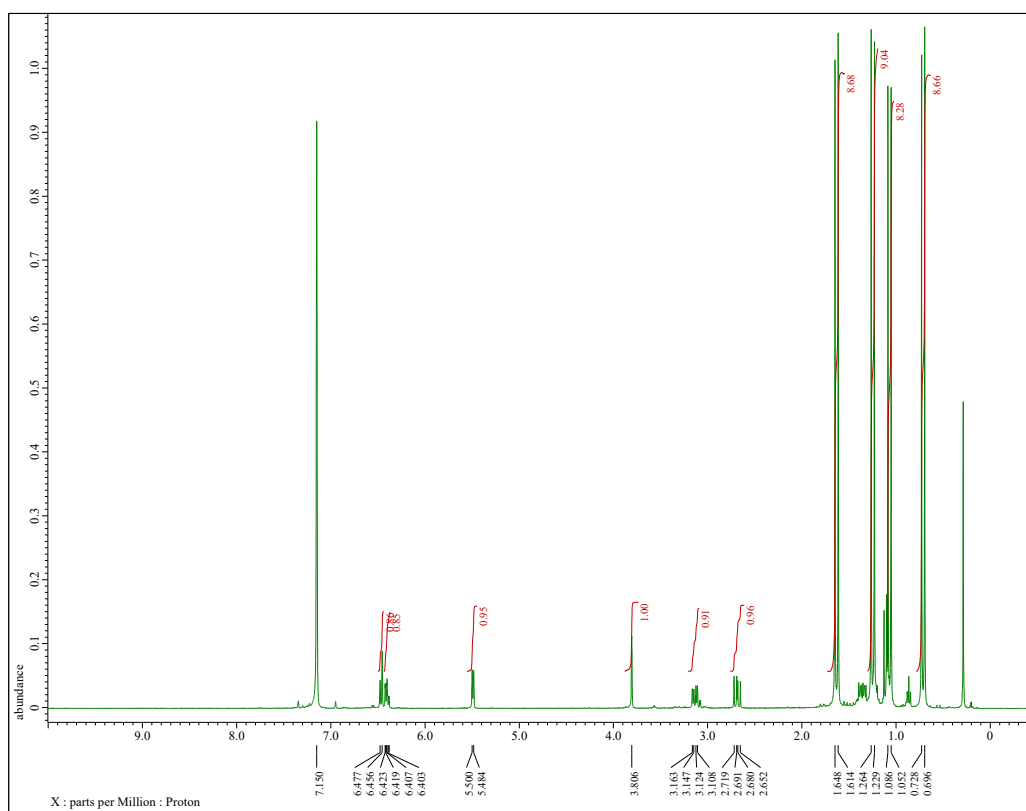

Fig. S16  $^1\text{H}$  NMR spectrum of **9** in  $\text{C}_6\text{D}_6$

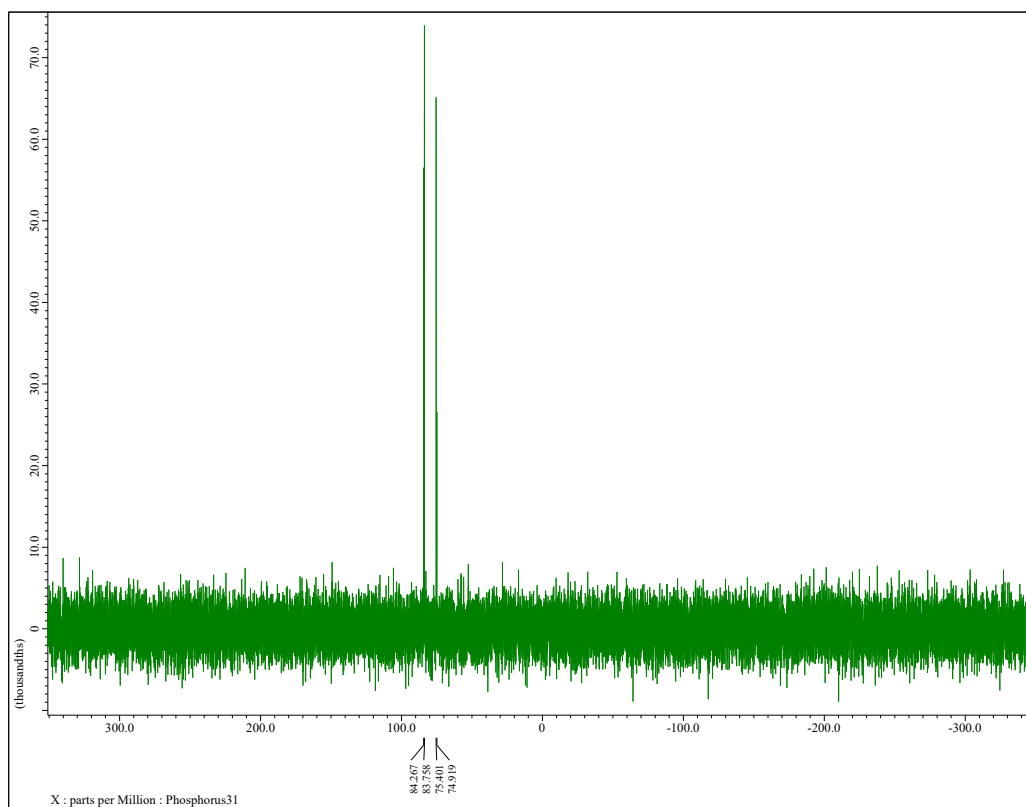

**Fig. S17**  $^{31}\text{P}\{^1\text{H}\}$  NMR spectrum of **9** in  $\text{C}_6\text{D}_6$

## IR spectra

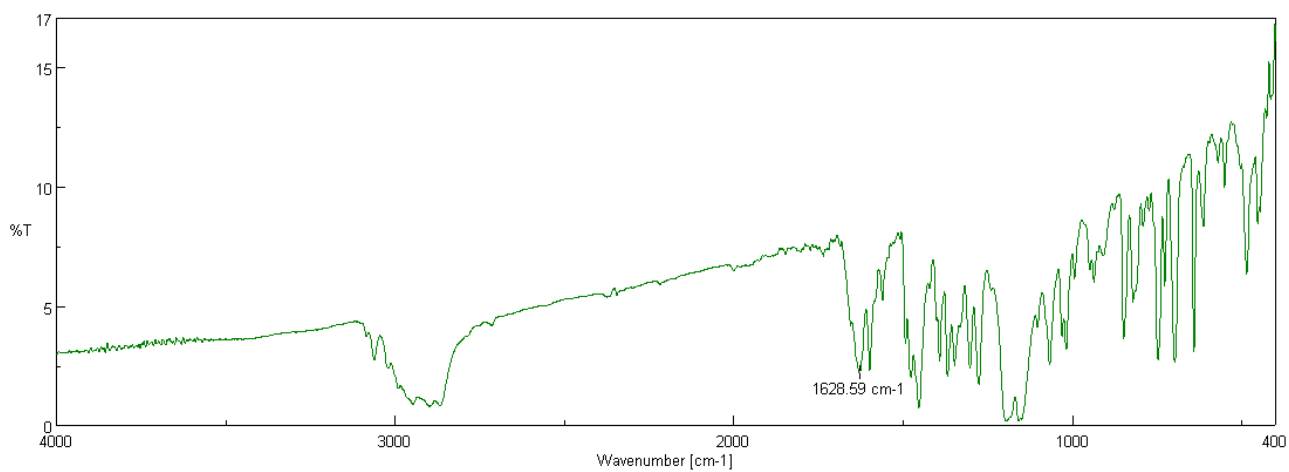

**Fig. S18** IR spectrum of **3** in KBr

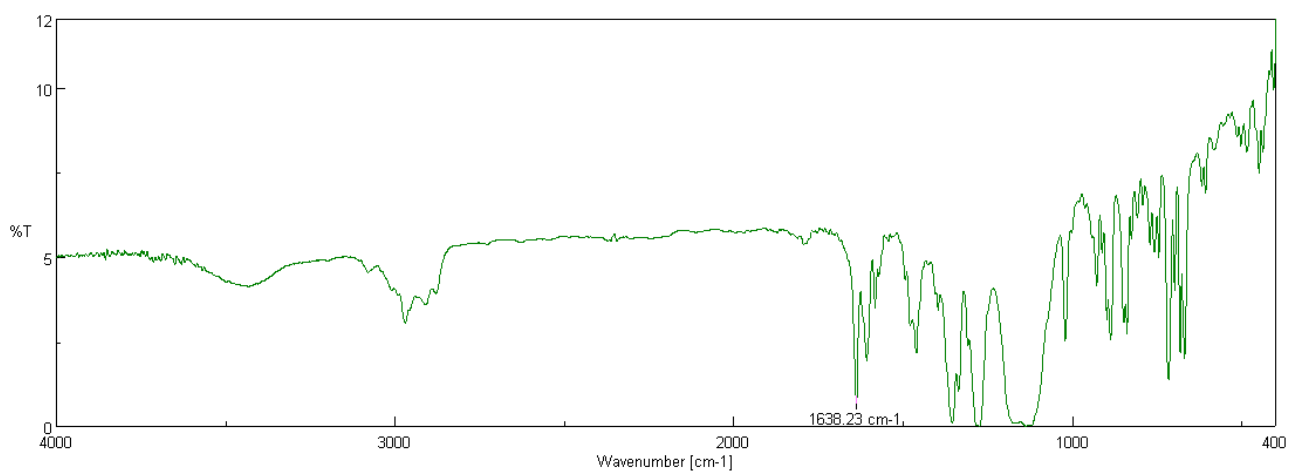

**Fig. S19** IR spectrum of **4** in KBr

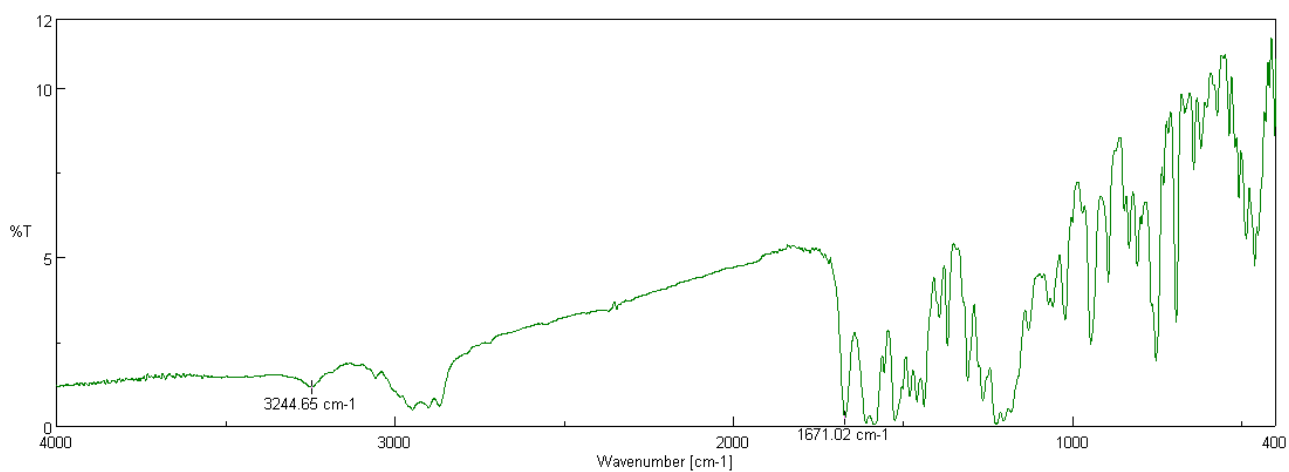

**Fig. S20** IR spectrum of **5** in KBr

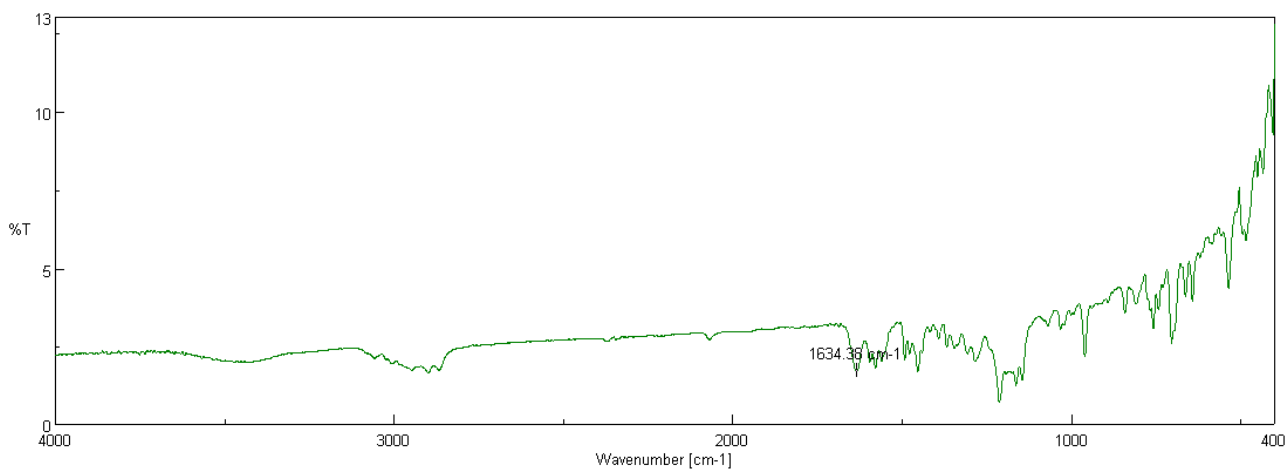

**Fig. S21** IR spectrum of **6** in KBr

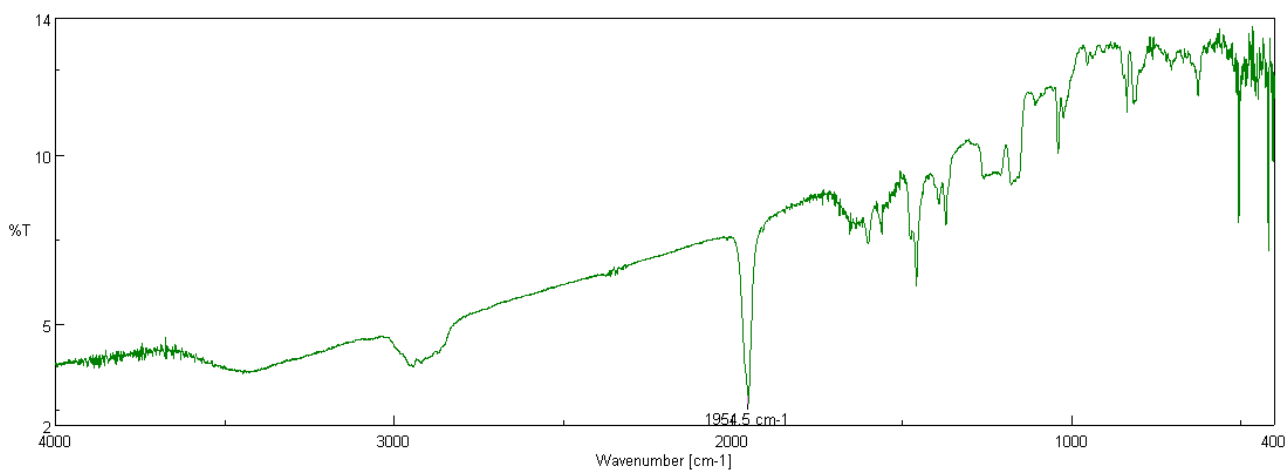

**Fig. S22** IR spectrum of **7** in KBr

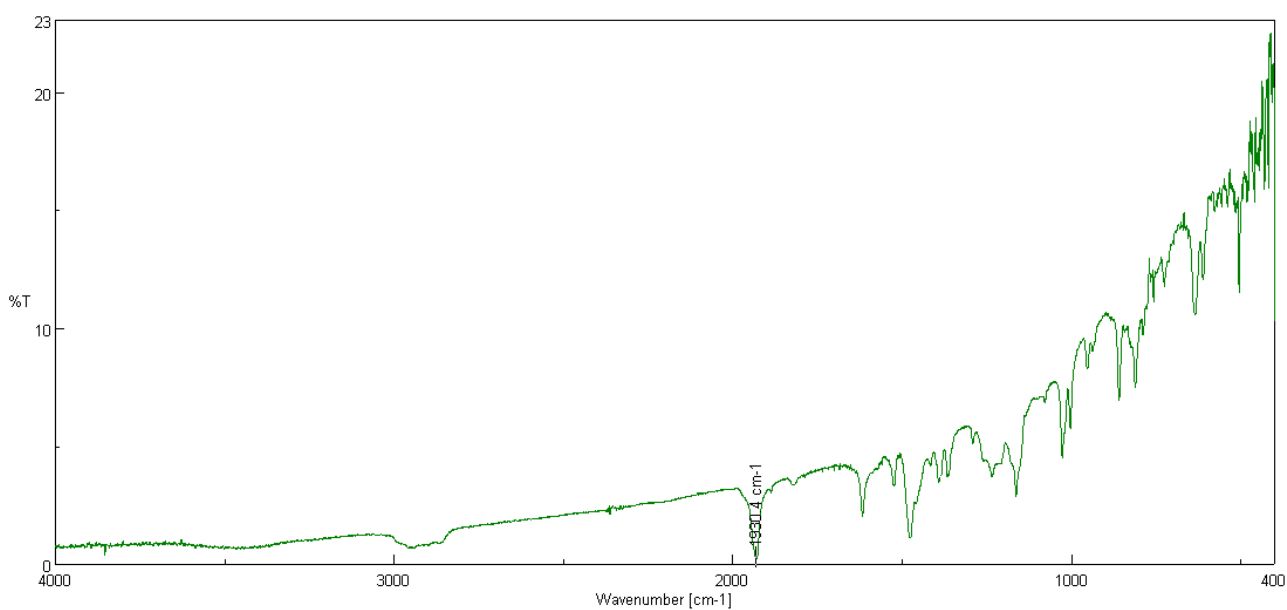

**Fig. S23** IR spectrum of **9** in KBr

### X-ray crystallography.

Diffraction data for **2**, **3**, **4**, **5**·THF **6**, **7**, **8**, and **9** were collected for the  $2\theta$  range of  $4^\circ$  to  $63^\circ$  at  $-180^\circ\text{C}$  on a Rigaku XtaLAB Synergy-S diffractometer equipped with a HyPix-6000HE Hybrid Photon Counting (HPC) detector and VariMax optics using multi-layer mirror monochromated Mo  $K\alpha$  radiation ( $\lambda = 0.71073 \text{ \AA}$ ). Intensity data were corrected for Lorenz-polarization effects and for empirical absorption (CrysAlisPro),<sup>S1</sup> whereas structure solutions and refinements were carried out by using the *CrystalStructure* crystallographic software package.<sup>S2</sup> Positions of non-hydrogen atoms were determined by direct methods (SHELXS Version 2013/1 for **2**, **3**, **4**, **5**·THF, **6**, **7**, and **8**; SHELXT Version 2014/5 for **9**)<sup>S3,S4</sup> and subsequent Fourier syntheses (SHELXL Version 2016/6),<sup>S5</sup> and were refined on  $F_o^2$  using all unique reflections by full-matrix least-squares with anisotropic thermal parameters. All the hydrogen atoms except for the H(H3N) atom in **5**·THF were placed at the calculated positions with fixed isotropic parameters. The position of the H(H3N) atom in **5**·THF was determined on the peak in the difference Fourier maps and further refined isotropically. Anomalous dispersion effects were included in  $F_o$ ,<sup>S6</sup> and mass attenuation coefficients, values for  $\Delta f'$  and  $\Delta f''$ , and neutral atom scattering factors were taken from references.<sup>S7–S9</sup> Details of the crystal and data collection parameters are summarized in [Tables S1–S3](#), and ORTEP drawings of molecular structures are shown in [Fig. S24–S31](#).

For **2**, the trifluoromethyl group (F10, F11A, F11B, F12, C44) in  $\text{BAr}^{\text{F}_4}$  anion were disordered, thus these non-hydrogen atoms were solved isotropically. In addition, **2** was solved as a pair of two enantiomeric twins (BASF = 0.12493) with the Flack parameter fixed at 0.

For **4**, the trifluoromethyl groups (F15, F16, F17, F18, F23, F24, C60, C61) in  $\text{BAr}^{\text{F}_4}$  anion were disordered, thus these non-hydrogen atoms were solved isotropically.

The unit cells of **3** and **6** contain solvent accessible voids of 349 and  $543 \text{ \AA}^3$ , respectively. The difference Fourier maps suggested that voids of **3** were occupied by half a THF molecule per asymmetric unit, which could not be located appropriately because of heavy disorders. The difference Fourier maps suggested that voids of **6** were occupied by a THF molecule per asymmetric unit, which could not be located appropriately because of heavy disorders. The electron density associated with these solvent molecules was removed by the SQUEEZE routine of PLATON<sup>S10</sup> for crystal data of **3** and **6**.

**Table S1** X-ray crystallographic data for 2, 3, 4

|                                                               | <b>2</b>                                                                                          | <b>3</b>                                                            | <b>4</b>                                                                                        |
|---------------------------------------------------------------|---------------------------------------------------------------------------------------------------|---------------------------------------------------------------------|-------------------------------------------------------------------------------------------------|
| chemical formula                                              | C <sub>61</sub> H <sub>66</sub> BF <sub>27</sub> MoN <sub>2</sub> O <sub>3</sub> P <sub>2</sub> S | C <sub>37</sub> H <sub>55</sub> ClIMoN <sub>2</sub> OP <sub>2</sub> | C <sub>69</sub> H <sub>65</sub> BF <sub>24</sub> MoN <sub>2</sub> O <sub>3</sub> P <sub>2</sub> |
| CCDC number                                                   | 2123058                                                                                           | 2123059                                                             | 2123060                                                                                         |
| formula weight                                                | 1588.92                                                                                           | 864.10                                                              | 1594.94                                                                                         |
| dimensions of crystals, mm <sup>3</sup>                       | 0.184 × 0.138 × 0.060                                                                             | 0.823 × 0.460 × 0.288                                               | 0.590 × 0.380 × 0.239                                                                           |
| crystal color, habit                                          | green, block                                                                                      | brown, block                                                        | brown, block                                                                                    |
| crystal system                                                | Monoclinic                                                                                        | monoclinic                                                          | orthorhombic                                                                                    |
| space group                                                   | <i>Cc</i>                                                                                         | <i>P2<sub>1</sub>/n</i>                                             | <i>P2<sub>1</sub>2<sub>1</sub>2<sub>1</sub></i>                                                 |
| <i>a</i> , Å                                                  | 19.6528(4)                                                                                        | 11.3993(3)                                                          | 13.3884(3)                                                                                      |
| <i>b</i> , Å                                                  | 18.6233(3)                                                                                        | 24.5388(4)                                                          | 14.0757(4)                                                                                      |
| <i>c</i> , Å                                                  | 19.0075(4)                                                                                        | 15.2165(3)                                                          | 37.3799(8)                                                                                      |
| <i>α</i> , deg                                                | 90                                                                                                | 90                                                                  | 90                                                                                              |
| <i>β</i> , deg                                                | 95.4900(18)                                                                                       | 106.053(2)                                                          | 90                                                                                              |
| <i>γ</i> , deg                                                | 90                                                                                                | 90                                                                  | 90                                                                                              |
| <i>V</i> , Å <sup>3</sup>                                     | 6924.8(2)                                                                                         | 4090.46(16)                                                         | 7044.3(3)                                                                                       |
| <i>Z</i>                                                      | 4                                                                                                 | 4                                                                   | 4                                                                                               |
| $\rho_{\text{calcd}}$ , g cm <sup>-3</sup>                    | 1.524                                                                                             | 1.403                                                               | 1.504                                                                                           |
| <i>F</i> (000)                                                | 3224                                                                                              | 1764                                                                | 3240                                                                                            |
| $\mu$ , cm <sup>-1</sup>                                      | 3.824                                                                                             | 12.474                                                              | 3.421                                                                                           |
| temperature, °C                                               | -180                                                                                              | -180                                                                | -180                                                                                            |
| trans. factors range                                          | 0.961 – 1.000                                                                                     | 0.200 – 0.698                                                       | 0.255 – 0.921                                                                                   |
| no. reflections measured                                      | 22733                                                                                             | 33248                                                               | 39708                                                                                           |
| no. unique reflections                                        | 13444 ( <i>R</i> <sub>int</sub> = 0.0299)                                                         | 10849 ( <i>R</i> <sub>int</sub> = 0.0853)                           | 17770 ( <i>R</i> <sub>int</sub> = 0.0673)                                                       |
| no. parameters refined                                        | 890                                                                                               | 418                                                                 | 891                                                                                             |
| <i>R</i> 1 ( <i>I</i> > 2 $\sigma$ ( <i>I</i> )) <sup>a</sup> | 0.0630                                                                                            | 0.0589                                                              | 0.0764                                                                                          |
| <i>wR</i> 2 (all data) <sup>b</sup>                           | 0.1670                                                                                            | 0.1739                                                              | 0.2002                                                                                          |
| GOF (all data) <sup>c</sup>                                   | 1.033                                                                                             | 1.112                                                               | 0.987                                                                                           |
| max diff peak / hole, e Å <sup>-3</sup>                       | +1.78 / -0.58                                                                                     | +1.95 / - 1.90                                                      | +1.69 / -0.86                                                                                   |
| Flack parameter                                               | 0                                                                                                 |                                                                     | -0.05(2)                                                                                        |

<sup>a</sup>  $R1 = \sum ||F_o| - |F_c|| / \sum |F_o|$ . <sup>b</sup>  $wR2 = [\sum w(F_o^2 - F_c^2)^2 / \sum w(F_o^2)]^{1/2}$ ,  $w = 1 / [\sigma^2(F_o^2) + (qP)^2 + rP]$ ,  $P = (\text{Max}(F_o^2, 0) + 2 F_c^2) / 3$  [ $q = 0.1242$  (**2**), 0.0889 (**3**), 0.1174 (**4**);  $r = 5.4329$  (**2**), 0.6266 (**3**), 0 (**4**)]. <sup>c</sup>  $GOF = [\sum w(F_o^2 - F_c^2)^2 / (N_o - N_{\text{params}})]^{1/2}$ .

**Table S2** X-ray crystallographic data for 5·THF, 6, 7

|                                                               | 5·THF                                                                           | 6                                                                               | 7                                                                 |
|---------------------------------------------------------------|---------------------------------------------------------------------------------|---------------------------------------------------------------------------------|-------------------------------------------------------------------|
| chemical formula                                              | C <sub>41</sub> H <sub>61</sub> IMoN <sub>4</sub> O <sub>3</sub> P <sub>2</sub> | C <sub>51</sub> H <sub>63</sub> IMoN <sub>2</sub> O <sub>2</sub> P <sub>2</sub> | C <sub>24</sub> H <sub>43</sub> IMoN <sub>2</sub> OP <sub>2</sub> |
| CCDC number                                                   | 2123061                                                                         | 2123062                                                                         | 2123063                                                           |
| formula weight                                                | 942.75                                                                          | 1020.86                                                                         | 660.41                                                            |
| dimensions of crystals, mm <sup>3</sup>                       | 0.959 × 0.720 × 0.422                                                           | 0.824 × 0.685 × 0.497                                                           | 0.143 × 0.127 × 0.037                                             |
| crystal color, habit                                          | green, block                                                                    | brown, block                                                                    | pink, plate                                                       |
| crystal system                                                | monoclinic                                                                      | monoclinic                                                                      | monoclinic                                                        |
| space group                                                   | <i>P</i> 2 <sub>1</sub> / <i>c</i>                                              | <i>P</i> 2 <sub>1</sub> / <i>c</i>                                              | <i>P</i> 2 <sub>1</sub> / <i>c</i>                                |
| <i>a</i> , Å                                                  | 14.8514(3)                                                                      | 12.6123(5)                                                                      | 15.8268(6)                                                        |
| <i>b</i> , Å                                                  | 14.5855(3)                                                                      | 17.4852(5)                                                                      | 15.8794(5)                                                        |
| <i>c</i> , Å                                                  | 20.1014(5)                                                                      | 23.5748(8)                                                                      | 12.0854(4)                                                        |
| <i>α</i> , deg                                                | 90                                                                              | 90                                                                              | 90                                                                |
| <i>β</i> , deg                                                | 102.659(2)                                                                      | 102.857(4)                                                                      | 104.863(4)                                                        |
| <i>γ</i> , deg                                                | 90                                                                              | 90                                                                              | 90                                                                |
| <i>V</i> , Å <sup>3</sup>                                     | 4248.42(17)                                                                     | 5068.6(3)                                                                       | 2935.68(18)                                                       |
| <i>Z</i>                                                      | 4                                                                               | 4                                                                               | 4                                                                 |
| $\rho_{\text{calcd}}$ , g cm <sup>-3</sup>                    | 1.474                                                                           | 1.338                                                                           | 1.494                                                             |
| <i>F</i> (000)                                                | 1936                                                                            | 2096                                                                            | 1336                                                              |
| $\mu$ , cm <sup>-1</sup>                                      | 11.517                                                                          | 9.689                                                                           | 16.244                                                            |
| temperature, °C                                               | -180                                                                            | -180                                                                            | -180                                                              |
| trans. factors range                                          | 0.124 – 0.615                                                                   | 0.144 – 0.618                                                                   | 0.196 – 0.942                                                     |
| no. reflections measured                                      | 37035                                                                           | 50196                                                                           | 25593                                                             |
| no. unique reflections                                        | 11329 ( <i>R</i> <sub>int</sub> = 0.0920)                                       | 14095 ( <i>R</i> <sub>int</sub> = 0.0951)                                       | 7934 ( <i>R</i> <sub>int</sub> = 0.0836)                          |
| no. parameters refined                                        | 481                                                                             | 544                                                                             | 292                                                               |
| <i>R</i> 1 ( <i>I</i> > 2 $\sigma$ ( <i>I</i> )) <sup>a</sup> | 0.0546                                                                          | 0.0607                                                                          | 0.0509                                                            |
| <i>wR</i> 2 (all data) <sup>b</sup>                           | 0.1430                                                                          | 0.1780                                                                          | 0.1361                                                            |
| GOF (all data) <sup>c</sup>                                   | 0.992                                                                           | 1.041                                                                           | 1.082                                                             |
| max diff peak / hole, e Å <sup>-3</sup>                       | + 1.62 / - 1.30                                                                 | +1.72 / -1.45                                                                   | + 1.89 / - 1.53                                                   |

<sup>a</sup>  $R1 = \sum ||F_o| - |F_c|| / \sum |F_o|$ . <sup>b</sup>  $wR2 = [\sum w(F_o^2 - F_c^2)^2 / \sum w(F_o^2)^2]^{1/2}$ ,  $w = 1 / [\sigma^2(F_o^2) + (qP)^2 + rP]$ ,  $P = (\text{Max}(F_o^2, 0) + 2 F_c^2) / 3$  [ $q = 0.0784$  (5·THF) 0.0981 (6) 0.0527 (7)];  $r = 0$  (5·THF, 6), 1.8678 (7)]. <sup>c</sup>  $GOF = [\sum w(F_o^2 - F_c^2)^2 / (N_o - N_{\text{params}})]^{1/2}$ .

**Table S3** X-ray crystallographic data for **8**, **9**

|                                                               | <b>8</b>                                              | <b>9</b>                                                         |
|---------------------------------------------------------------|-------------------------------------------------------|------------------------------------------------------------------|
| chemical formula                                              | C <sub>23</sub> H <sub>43</sub> ClIMoNOP <sub>2</sub> | C <sub>24</sub> H <sub>42</sub> MoN <sub>2</sub> OP <sub>2</sub> |
| CCDC number                                                   | 2123064                                               | 2123065                                                          |
| formula weight                                                | 669.84                                                | 532.50                                                           |
| dimensions of crystals, mm <sup>3</sup>                       | 0.305 × 0.213 × 0.111                                 | 0.994 × 0.254 × 0.151                                            |
| crystal color, habit                                          | green, block                                          | red, plate                                                       |
| crystal system                                                | monoclinic                                            | monoclinic                                                       |
| space group                                                   | <i>P</i> 2 <sub>1</sub> / <i>n</i>                    | <i>P</i> 2 <sub>1</sub> / <i>c</i>                               |
| <i>a</i> , Å                                                  | 13.0791(5)                                            | 16.1322(4)                                                       |
| <i>b</i> , Å                                                  | 15.0104(4)                                            | 10.9355(4)                                                       |
| <i>c</i> , Å                                                  | 15.3134(5)                                            | 15.4225(5)                                                       |
| <i>α</i> , deg                                                | 90                                                    | 90                                                               |
| <i>β</i> , deg                                                | 106.185(4)                                            | 98.881(3)                                                        |
| <i>γ</i> , deg                                                | 90                                                    | 90                                                               |
| <i>V</i> , Å <sup>3</sup>                                     | 2887.21(17)                                           | 2688.12(15)                                                      |
| <i>Z</i>                                                      | 4                                                     | 4                                                                |
| $\rho_{\text{calcd}}$ , g cm <sup>-3</sup>                    | 1.541                                                 | 1.316                                                            |
| <i>F</i> (000)                                                | 1352                                                  | 1120                                                             |
| $\mu$ , cm <sup>-1</sup>                                      | 17.41                                                 | 6.232                                                            |
| temperature, °C                                               | -180                                                  | -180                                                             |
| trans. factors range                                          | 0.568 – 1.000                                         | 0.222 – 0.910                                                    |
| no. reflections measured                                      | 25111                                                 | 27342                                                            |
| no. unique reflections                                        | 7237 ( <i>R</i> <sub>int</sub> = 0.0583)              | 7443 ( <i>R</i> <sub>int</sub> = 0.1024)                         |
| no. parameters refined                                        | 283                                                   | 283                                                              |
| <i>R</i> 1 ( <i>I</i> > 2 $\sigma$ ( <i>I</i> )) <sup>a</sup> | 0.0516                                                | 0.0766                                                           |
| <i>wR</i> 2 (all data) <sup>b</sup>                           | 0.1412                                                | 0.2131                                                           |
| GOF (all data) <sup>c</sup>                                   | 1.070                                                 | 1.091                                                            |
| max diff peak / hole, e Å <sup>-3</sup>                       | + 1.30 / - 1.42                                       | +1.96 / -1.70                                                    |

<sup>a</sup>  $R1 = \sum ||F_o| - |F_c|| / \sum |F_o|$ . <sup>b</sup>  $wR2 = [\sum w(F_o^2 - F_c^2)^2 / \sum w(F_o^2)^2]^{1/2}$ ,  $w = 1 / [\sigma^2(F_o^2) + (qP)^2 + rP]$ ,  $P = (\text{Max}(F_o^2, 0) + 2 F_c^2) / 3$  [ $q = 0.0624$  (**8**),  $0.1091$  (**9**);  $r = 4.1602$  (**8**),  $3.2213$  (**9**)]. <sup>c</sup>  $\text{GOF} = [\sum w(F_o^2 - F_c^2)^2 / (N_o - N_{\text{params}})]^{1/2}$ .



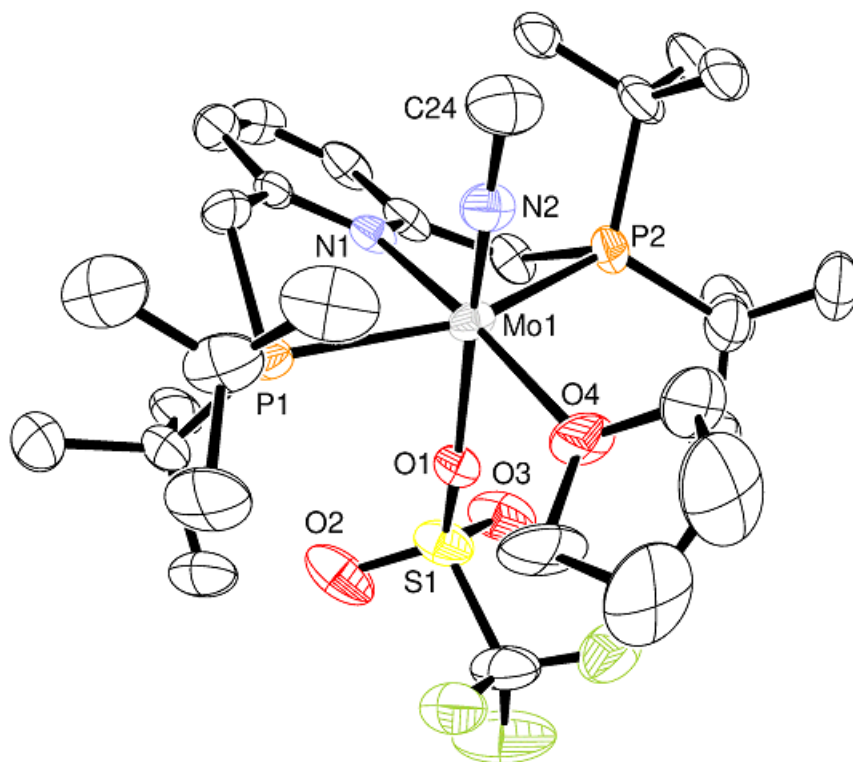

**Fig. S24** Molecular structure of the cationic part of **2**. Thermal ellipsoids are shown at the 50% probability level, and hydrogen atoms are omitted for clarity. Selected bond lengths (Å) and angles (deg): Mo1–N1 2.151(4), Mo1–N2 1.721(6), Mo1–O1 2.223(4), Mo1–O4 2.189(4), Mo1–P1 2.5974(17), Mo1–P2 2.5575(18), N2–C24 1.445(11); P1–Mo1–P2 155.33(6), Mo1–N2–C24 179.2(7).

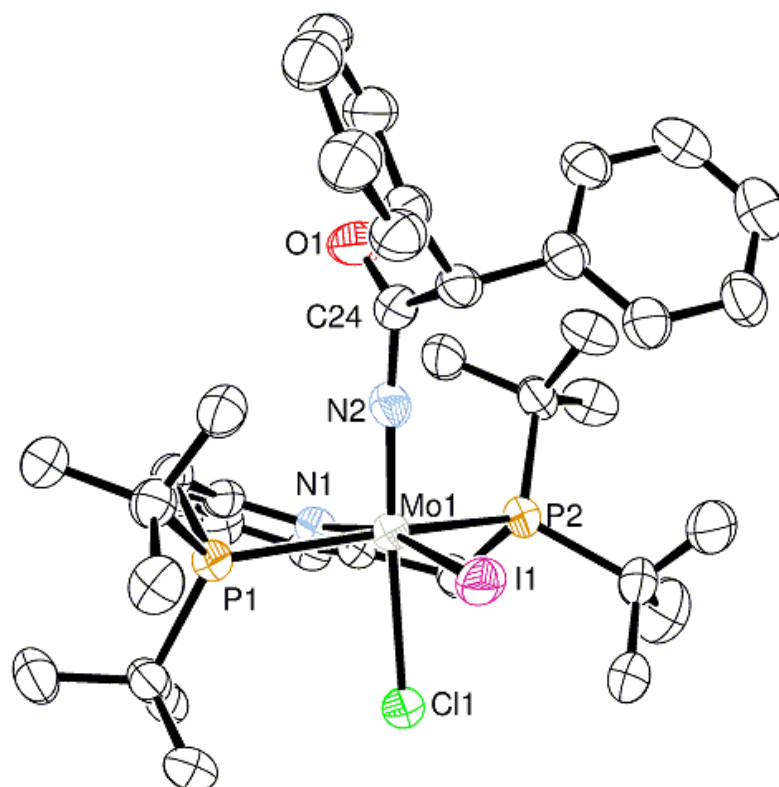

**Fig. S25** Molecular structure of **3**. Thermal ellipsoids are shown at the 50% probability level, and hydrogen atoms are omitted for clarity. Selected bond lengths (Å) and angles (deg): Mo1–N1 2.181(3), Mo1–N2 1.768(3), Mo1–P1 2.5606(10), Mo1–P2 2.5584(10), Mo1–I1 2.8472(4), Mo1–Cl1 2.4784(9), N2–C24 1.381(5), O1–C24 1.209(5); P1–Mo1–P2 154.45(3), Mo1–N2–C24 172.7(3), N2–C24–O1 121.4(4), N2–C24–C25 115.3(3), O1–C24–C25 123.4(4).

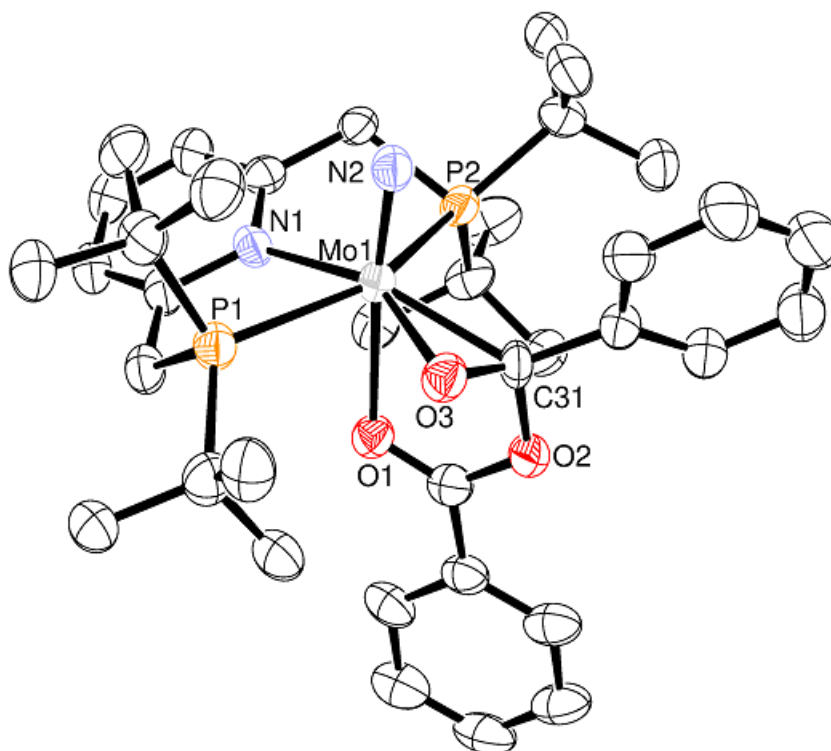

**Fig. S26** Molecular structure of the cationic part of **4**. Thermal ellipsoids are shown at the 50% probability level, and hydrogen atoms are omitted for clarity. Selected bond lengths (Å) and angles (deg): Mo1–N1 2.247(6), Mo1–N2 1.654(5), Mo1–O1 2.379(5), Mo1–O3 2.058(5), Mo1–C31 2.187(7), Mo1–P1 2.573(2), Mo1–P2 2.6256(18), O3–C31 1.319(9); P1–Mo1–P2 152.09(6), N1–Mo1–N2 99.6(2), O3–Mo1–C31 36.0(2).

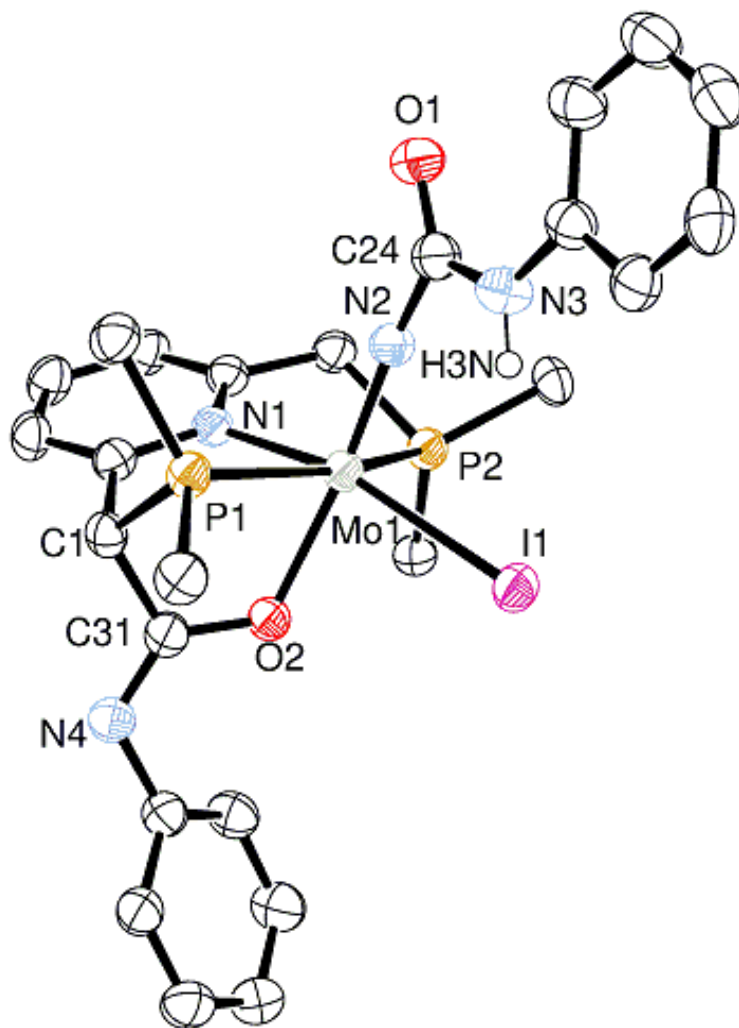

**Fig. S27** Molecular structure of **5**. Thermal ellipsoids are shown at the 50% probability level, and hydrogen atoms except for H3N as well as solvent molecules are omitted for clarity. Selected bond lengths (Å) and angles (deg): Mo1–N1 2.165(3), Mo1–N2 1.755(3), Mo1–O2 2.115(2), Mo1–P1 2.5068(9), Mo1–P2 2.5255(9), Mo1–I1 2.8373(3), N2–C24 1.394(4), O1–C24 1.226(4), N3–C24 1.352(4), O2–C31 1.317(4), N4–C31 1.283(4), C1–C31 1.532(4); P1–Mo1–P2 156.98(3), Mo1–N2–C24 164.9(2), N2–C24–O1 122.5(3), O1–C24–N3 126.0(3), N2–C24–N3 111.5(3), O2–C31–N4 128.9(3), O2–C31–C1 113.4(3), N4–C31–C1 117.7(3).

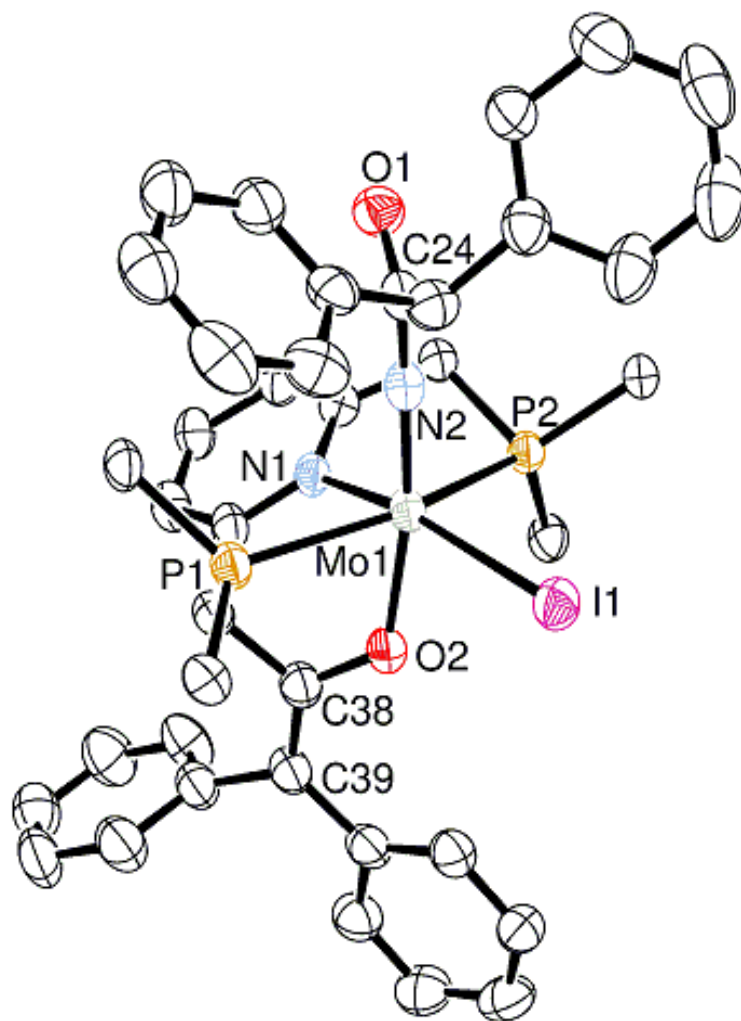

**Fig. S28** Molecular structure of **6**. Thermal ellipsoids are shown at the 50% probability level, and hydrogen atoms are omitted for clarity. Selected bond lengths (Å) and angles (deg): Mo1–N1 2.172(3), Mo1–N2 1.796(3), Mo1–O2 2.040(2), Mo1–P1 2.5329(9), Mo1–P2 2.5208(9), Mo1–I1 2.8413(4), N2–C24 1.364(5), O1–C24 1.224(4), O2–C38 1.328(4), C38–C39 1.357(5); P1–Mo1–P2 153.29(3), Mo1–N2–C24 172.6(3), N2–C24–O1 123.1(3), O1–C24–C25 121.6(3), N2–C24–C25 115.2(3), O2–C38–C39 125.0(3), O2–C38–C1 111.4(3), C1–C38–C39 123.6(3).

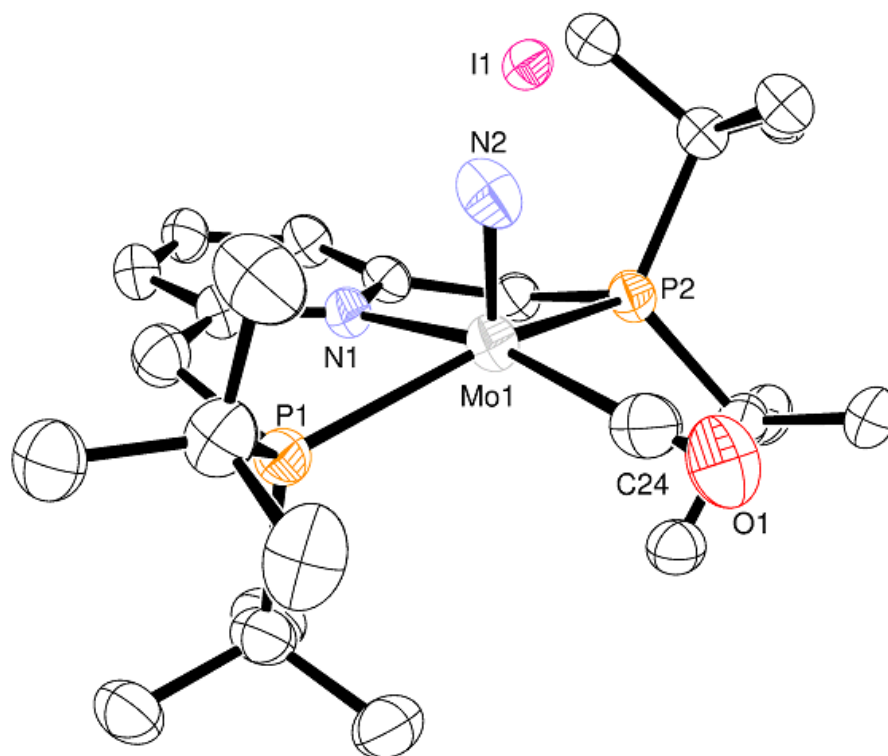

**Fig. S29** Molecular structure of **7**. Thermal ellipsoids are shown at the 50% probability level, and hydrogen atoms are omitted for clarity. Selected bond lengths (Å) and angles (deg): Mo1–N1 2.237(4), Mo1–N2 1.634(4), Mo1–P1 2.4880(12), Mo1–P2 2.4953(12), Mo1–C24 2.111(7), O1–C24 0.981(6); P1–Mo1–P2 150.38(4), N1–Mo1–C24 165.63(17), N2–Mo1–C24 92.3(2), N1–Mo1–N2 102.00(18).  $\tau = 0.254$

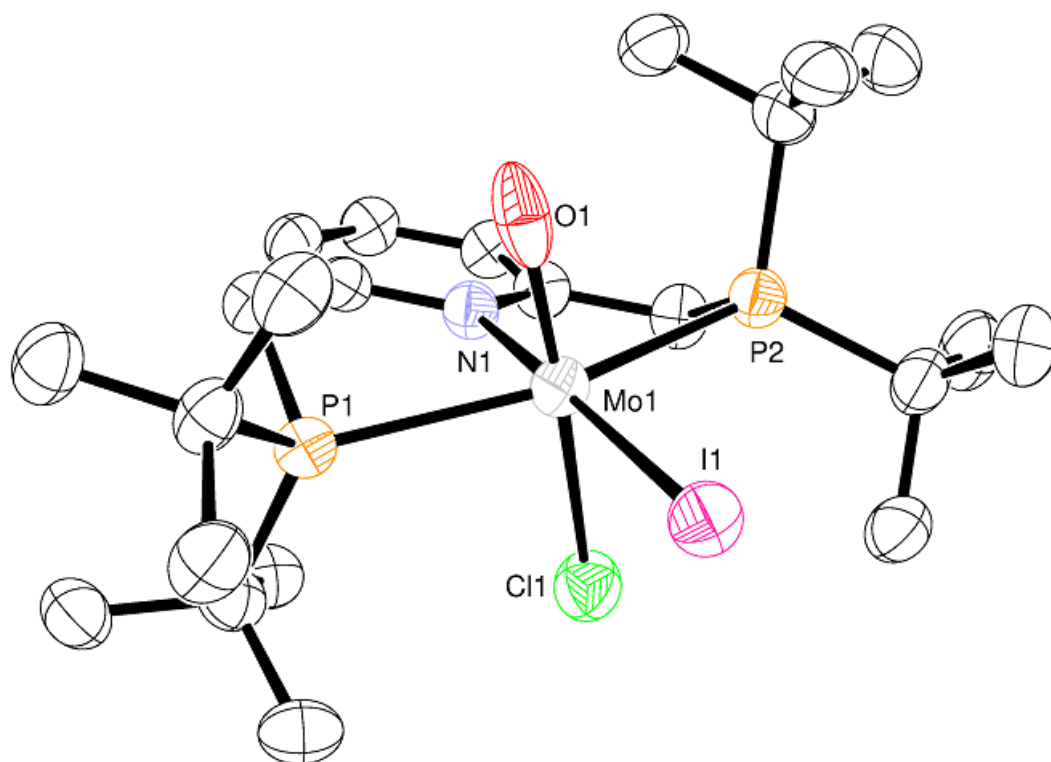

**Fig. S30** Molecular structure of **8**. Thermal ellipsoids are shown at the 50% probability level as well as hydrogen atoms are omitted for clarity. Selected bond lengths (Å) and angles (deg): Mo1–N1 2.190(4), Mo1–O1 1.870(5), Mo1–P1 2.5272(13), Mo1–P2 2.5619(13), Mo1–I1 2.8247(5), Mo1–Cl1 2.4549(14); P1–Mo1–P2 158.23(4).

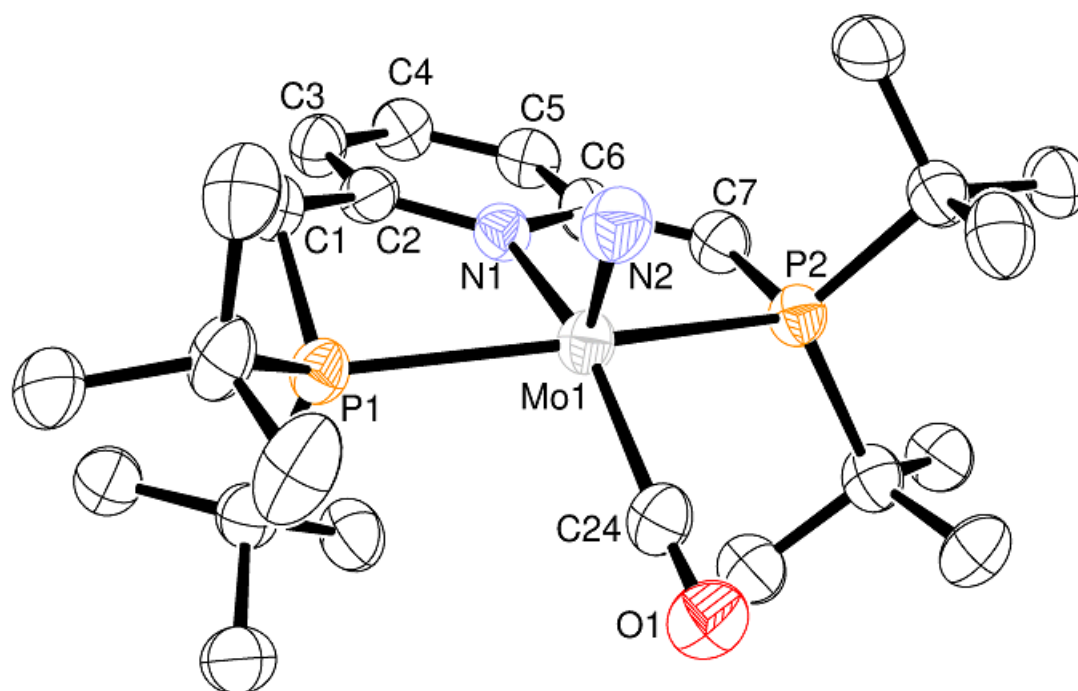

**Fig. S31** Molecular structure of **9**. Thermal ellipsoids are shown at the 50% probability level, and hydrogen atoms are omitted for clarity. Selected bond lengths (Å) and angles (deg): Mo1–N1 2.219(4), Mo1–N2 1.660(4), Mo1–P1 2.4977(12), Mo1–P2 2.5150(11), Mo1–C24 2.027(5), O1–C24 1.136(6), N1–C2 1.362(6), N1–C6 1.405(5), C1–C2 1.504(6), C2–C3 1.376(6), C3–C4 1.408(7), C4–C5 1.348(7), C5–C6 1.447(7), C6–C7 1.386(7); P1–Mo1–P2 152.13(4), N1–Mo1–C24 156.42(17), N2–Mo1–C24 93.1(2), N1–Mo1–N2 110.48(18). Selected torsion angles (deg): P1–C1–C2–N1 –37.7(5), N1–C6–C7–P2 0.5(7).  $\tau = 0.0715$



## References.

- S1 *CrysAlisPro*: Data Collection and Processing Software; Rigaku Corp., Tokyo, Japan, 2015.
- S2 *CrystalStructure 4.3*: Crystal Structure Analysis Package, Rigaku Corp., Tokyo, Japan, 2000-2019.
- S3 G. M. Sheldrick, *Acta Crystallogr., Sect. A: Found. Crystallogr.* 2008, **64**, 112–122.
- S4 G. M. Sheldrick, *Acta Crystallogr., Sect. A: Found. Adv.* 2015, **71**, 3–8.
- S5 G. M. Sheldrick, *Acta Crystallogr., Sect. C: Struct. Chem.* 2015, **71**, 3–8.
- S6 J. A. Ibers and W. C. Hamilton, *Acta Crystallogr.*, 1964, **17**, 781–782.
- S7 D. C. Creagh and J. H. Hubbell in *International Tables for Crystallography, Vol. C*, ed. A. J. C. Wilson, Kluwer Academic Publishers, Dordrecht, 1992, Table 4.2.4.3., pp. 200–206.
- S8 D. C. Creagh and W. J. McAuley in *International Tables for Crystallography, Vol. C*, ed. A. J. C. Wilson, Kluwer Academic Publishers, Dordrecht, 1992; Table 4.2.6.8., pp. 219–222.
- S9 E. N. Maslen, A. G. Fox, M. A. O'Keefe in *International Tables for Crystallography, Vol. C*, ed. A. J. C. Wilson, Kluwer Academic Publishers, Dordrecht, 1992, Table 6.1.1.4., pp. 500–503.
- S10 A. L. Spek, *Acta Crystallogr., Sect. C Struct. Chem.* 2015, **71**, 9–18.
